# Supplementary material
Source: PubMed Central journal article supplement (PMC5928862)
Supplement: jciinsight-3-98487-s001.pdf [file jciinsight-3-98487-s001.pdf]

# Supplemental Figure 1

A

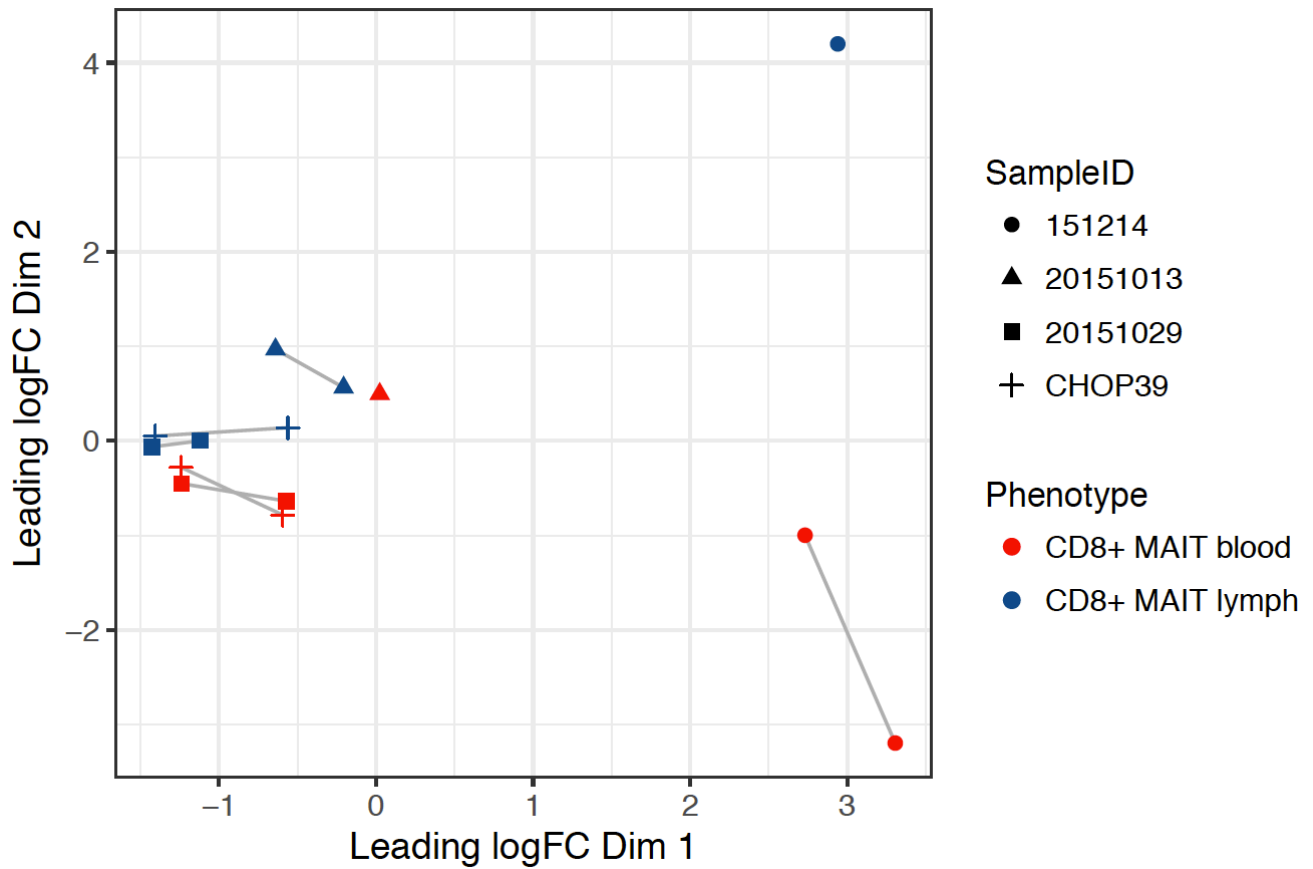

**Suppl. Fig. 1.** Clustering of technical replicates of the RNAseq experiments is shown for each donor. Technical replicates are not available in two instances: MAIT cells from blood of donor 20151013 and MAIT cells from lymph of donor 151214.

## Supplemental Figure 2

| <b>Antibody clone and instrument information</b> |                    |                |              |                 |
|--------------------------------------------------|--------------------|----------------|--------------|-----------------|
| <b>BD FACSymphony</b>                            |                    |                |              |                 |
| <b>Laser</b>                                     | <b>Fluorophore</b> | <b>Antigen</b> | <b>Clone</b> | <b>Purpose</b>  |
| 355nm                                            | BUV395             | CD8            | RPA-T8       | Lineage marker  |
| 65mW                                             | Violet L/D         | dead           | N.A          | Basic gating    |
|                                                  | BUV496             | CD3            | UCHT1        | Lineage marker  |
|                                                  | BUV563             | CD25           | 2A3          | T cell function |
|                                                  | BUV661             | HLA-DR         | G46-6        | T cell function |
|                                                  | BUV737             | ICOS (CD278)   | DX29         | T cell function |
|                                                  | BUV805             | CD45           | HI30         | Lineage marker  |
| 405nm                                            | BV421              | PD1 (CD279)    | EH12.2H7     | T cell function |
| 200mW                                            | BV480              | CD28           | CD28.2       | T cell function |
|                                                  | BV570              | CD45RA         | HI100        | T cell function |
|                                                  | BV605              | CCR6           | 11A9         | T cell function |
|                                                  | BV650              | CD69           | FN50         | T cell function |
|                                                  | BV711              | OX40           | ACT-35       | T cell function |
|                                                  | BV750              | CD103          | Ber-ACT8     | T cell function |
|                                                  | BV785              | CD127 (IL7Ra)  | HIL-7R-M21   | T cell function |
| 488nm                                            | BB515              | Tim3           | 7D3          | T cell function |
| 200mW                                            | BB630              | BTLA           | J168-540     | T cell function |
|                                                  | BB660              | CD27           | M-T271       | T cell function |
|                                                  | BB700              | empty          | N.A          |                 |
|                                                  | BB790              | CD38           | HIT2         | T cell function |
| 532nm                                            | PE                 | MR1-Tet        | N.A          | MAIT marker     |
| 200mW                                            | PE-CF594           | TCRgd          | B1           | Lineage marker  |
|                                                  | PE-Cy5             | CD137          | 4B4-1        | T cell function |
|                                                  | PE-Cy5.5           | CD19           | SJ25-C1      | Lineage marker  |
|                                                  | PE-Cy7             | CCR7           | 3D12         | T cell function |
| 628nm                                            | AF647              | CD161          | DX12         | MAIT marker     |
| 200mW                                            | AF700              | Va7.2          | 3C10         | MAIT marker     |
|                                                  | APC-H7             | CD4            | RPA-T4       | Lineage marker  |

**Suppl. Fig. 2.** 27 color panel design and antibody clone information.
